# Supplementary material for: Genome mining unveils a class of ribosomal peptides with two amino termini
Source: PubMed Central journal article supplement (PMC10036551; doi:10.1038/s41467-023-37287-1), 2023-03-23
Supplement: 41467_2023_37287_MOESM3_ESM.pdf [file 41467_2023_37287_MOESM3_ESM.pdf]

## **Description of Additional Supplementary Files**

**Supplementary Data 1:** Bioinformatics results for the daptide class. Contains the gene co-occurrence data for all identified daptide BGCs, a list of identified daptide proteases, the list of commonly co-occurring enzyme families, and the list of identified daptide precursor peptides.

**Supplementary Data 2:** Phylogenetic data for daptide aminotransferase tree. Contains PhyloXML data required for recreation of the daptide aminotransferase phylogenetic tree.
